# Supplementary material for: Whole-genome sequencing reveals insights into the adaptation of French Charolais cattle to Cuban tropical conditions
Source: Springer Nature journal article supplement (doi:10.1186/s12711-020-00597-9), 2021-01-04

**CHCU\_1**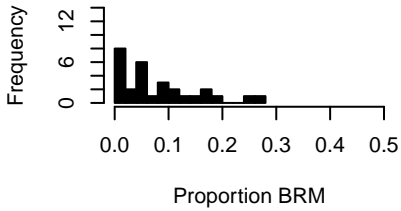**CHCU\_2**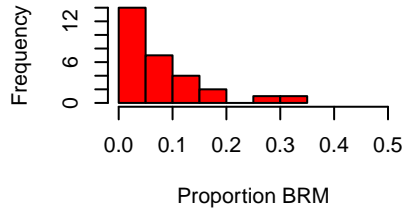**CHCU\_3**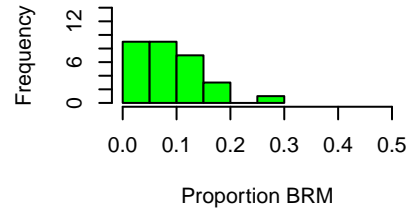**CHCU\_4**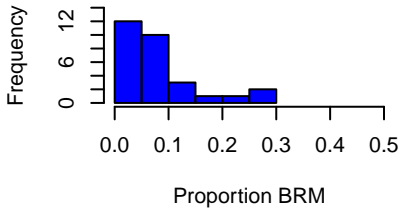**CHCU\_5**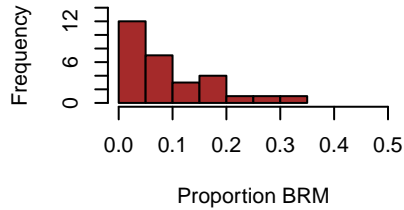**CHCU\_6**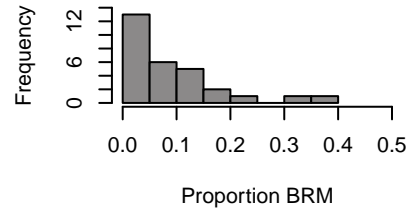**CHCU\_7**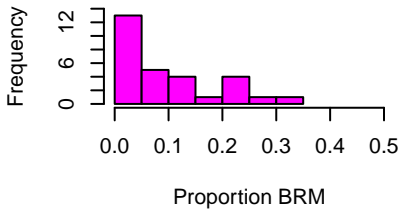**CHCU\_8**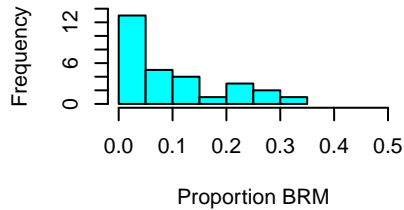**CHCU\_9**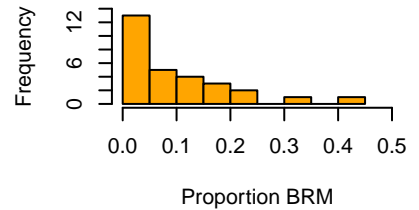**CHCU\_10**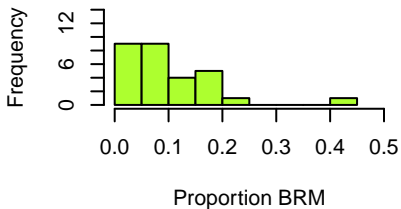**CHCU\_11**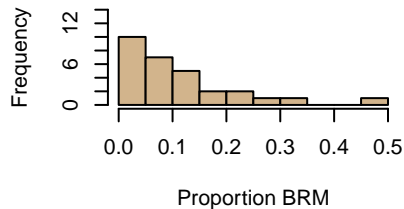**CHCU\_12**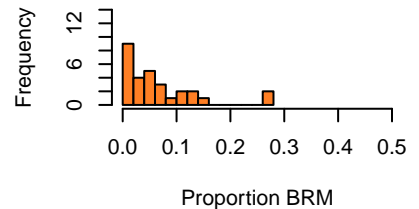

Supplement: MOESM2 [file 12711_2020_597_MOESM2_ESM.pdf]
