# Supplementary material for: Whole-genome sequencing reveals insights into the adaptation of French Charolais cattle to Cuban tropical conditions
Source: Springer Nature journal article supplement (doi:10.1186/s12711-020-00597-9), 2021-01-04

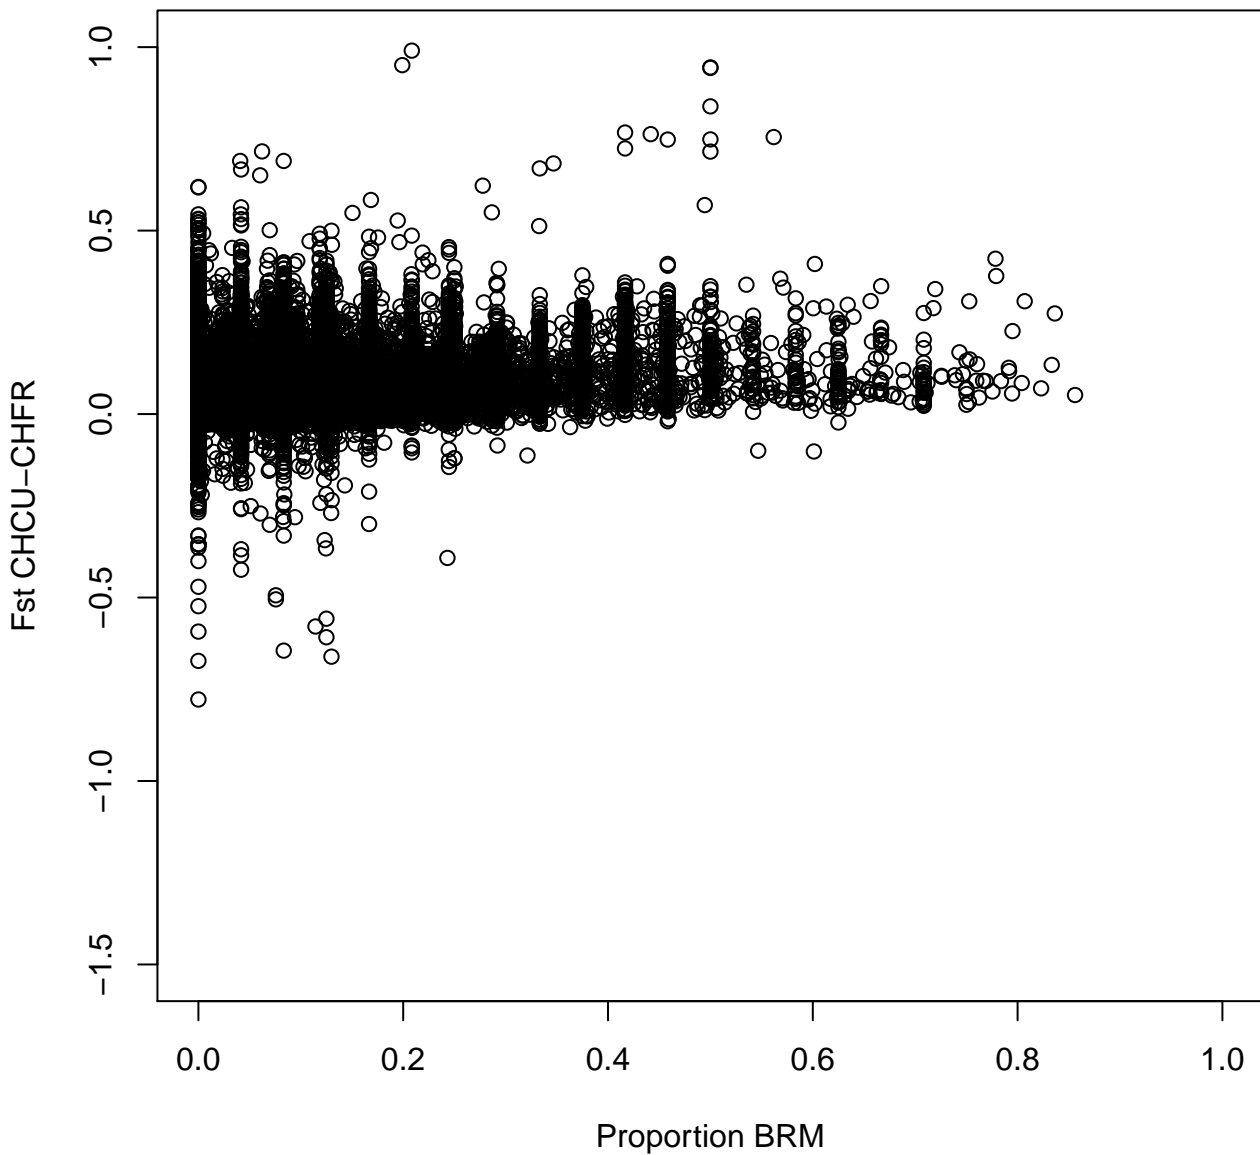

Supplement: MOESM3 [file 12711_2020_597_MOESM3_ESM.pdf]
